# Supplementary material for: Selection of homemade mask materials for preventing transmission of COVID-19: A laboratory study
Source: PLoS One. 2020 Oct 15;15(10):e0240285. doi: 10.1371/journal.pone.0240285 (PMC7561133; doi:10.1371/journal.pone.0240285)
Supplement: S1 Table — (XLSX) [file pone.0240285.s001.xlsx]

## Sheet: Sheet1
Previous research on homemade mask materials
Author	Year of publication	Homemade mask materials included in studies	Test contents	Results
Davies et al.	2013	100% cotton T-shirt, scarf,tea towel,pillowcase,antimicrobial pillowcase,vacuum cleaner bag,cotton mix,linen and silk	1.The filtration efficiency of Bacillus atrophaeus and Bacteriophage MS2 2.Pressure drop across fabric 3.The fit factor of the mask 4.Prevention of droplet and particle dissemination when coughing	The median-fit factor of the homemade masks was one-half that of the surgical masks. Both masks significantly reduced the number of microorganisms expelled by volunteers, although the surgical mask was 3 times more effective in blocking transmission than the homemade mask.
Rengasamy et al.	2010	Sweatshirts, T-shirts, towels, scarves,and cloth masks	Polydisperse and monodisperse aerosols at two different face velocities	The study showed that common fabric materials may provide marginal protection against nanoparticles including those in the size ranges of virus-containing particles in exhaled breath.
Van der Sande et al.	2008	Tea cloth	1.Short term protection for different types of masks worn during 10–15 minutes by the same volunteer following a standardized protocol 2. Long-term protection of a specific mask worn continuously by a volunteer for 3 hours during regular activities 3.Effectiveness of different types of mask in preventing outgoing transmission by a simulated infectious subject	All types of masks reduced aerosol exposure, relatively stable over time, unaffected by duration of wear or type of activity, but with a high degree of individual variation. Personal respirators were more efficient than surgical masks, which were more efficient than home-made masks.
Dato et al.	2006	T-shirts	The challenge agent used is the ambient microscopic dust and other aerosols that are present in the air	The authors showed that a hand-fashioned mask can provide a good fit and a measurable level of protection from a challenge aerosol.When made by naive users, this mask may be less effective because of variations in material, assembly, facial structure, cultural practices, and handling.
Cooper et al.	1983	Cotton/polyester shirt,cotton handkerchief,towel	Materials were tested on a manikin connected to a breathing simulator to determine the fraction of an approximately 2-µm diameter aerosol that would leak around the seal between the materials and the manikin's face	Use of nylon hosiery material (“panty hose”) to hold the handkerchief material or the disposable face mask to the face was found to be very effective in preventing leakage.
Guyton et al.	1959	Bath towel, cotton shirt,handerchief,toilet papers	The filtration efficiency of Bacillus globigii aerosols	The authors reported that the filtration efficiency of single layer of bath towel, cotton shirt, handkerchief, and other materials was in the 28–73% range against Bacillus globigii aerosols of 2000 nm mass median diameter.
